# Supplementary material
Source: publisher site journal article supplement (https://www.dovepress.com/article/267834)
Supplement: Supplementary file 1 [file get_supplementary_file.php]

Appendix 1: Principles of learning used in Firecracker Platform

| **Learning theories** | **Description** | **Examples** |
| --- | --- | --- |
| Contiguity effect | Ideas that are associated should be presented contiguously in space and time | Related facts are group together |
| Dual Code and Multimedia effects | Visual and multimedia form richer representations than do a single medium | Use relevant images alongside text content. |
| Coherence effect | Materials should explicitly link related ideas | Links related concepts with topics and exam questions |
| Segmentation principle | Complex lessons should be broken down into manageable sub-parts | Use key concepts and supportive concepts |
| Cognitive flexibility | This improves with multiple viewpoints linking facts and deep conceptual principles | Materials are presented and integrated in different modules/courses with varying difficulty of exam questions |
| Anchored learning | Materials are anchored in real-world problems | Concepts are presented with their clinical correlates with reinforcing exam questions |
| **Organisation effects** | Outlining, integrating, and synthesising information produces better learning than rereading materials or other more passive strategies | Help to creating students’ own topics, add concepts and questions to existing topics |
| **Imperfect metacognition** | We rarely have an accurate knowledge of our cognition and need assistance with calibrating comprehension, learning, and memory | Help to solve this problem (quizzes) to understand and remember facts |
| **Desirable difficulties** | Challenges make learning and retrieval effortful leading to improved retention | By varying question difficulty |
| **Cognitive disequilibrium** | Deep reasoning and learning is stimulated by problems that create cognitive disequilibrium, such as obstacles to goals, contradictions, conflict, and anomalies | Use exam questions which are often “2-jump” or “3-jump” questions require to integrate disparate knowledge |
| **Generation effect** | Learning is enhanced when learners must produce answers, not merely recognise answers [ | Open-ended study questions with no answers/prompts and answers only appear when students formulated the answer on their |
| **Testing effect** | Testing enhances learning, especially when the tests are aligned with important concepts | Constantly assess and test important concepts |
| **Feedback effects** | Students benefit from immediate feedback on their performance | After each review session, students are informed how they did and how they are doing overall |
| **Negative suggestion effects** | Learning wrong information can be reduced when feedback is immediate | Students received feedback about the right answer immediately after they answer a question |
| **Deep questions** | Learners derive more benefit from answering questions that elicit explanations (e.g., why, why not, how, what-if) | Provide elicit explanations for some Questions. |
| **Spaced effects** | Spacing our learning out over time produces better long-term retention than does a single test or study session | Provide opportunity for spaced learning to enhance learning, retention and application |
| **Goldilocks principle** | Assignments should be at the right difficulty level. | Varies the difficulty of students, review depending on their level of mastery. The more you know, the harder it gets |
| **Self-regulated learning** | Most students learn more faster if they self-regulate their learning | Help what to study and when and empowers students with the right data to make educated decisions |
| **Exam expectations** | Students benefit more from repeated testing and the expectation thereof | Opportunity for constant testing |

Ref: Firecracker. Firecracker uses 20 Proven Principles of Learning & Memory. <http://blog.firecracker.me/students/20-proven-principles-of-learning-memory> (accessed April 2020)
