# Supplementary material
Source: publisher site journal article supplement (https://www.dovepress.com/article/267834)
Supplement: Supplementary file 2 [file get_supplementary_file.php]

## Appendix 2

### The University of the West Indies Faculty of Medical Sciences

#### Feedback on Firecracker 2018

The following questions are designed to evaluate the organization and administration of Firecracker. Completion of this form will provide the Firecracker team with useful information to improve assessment methods. Participation in this study is voluntary and your confidentiality is assured. Your name is not required in this study.

1. Gender:     Male                       Female

2.

3. Which of these best summarizes your sentiments about Firecracker?

              

4. What do you like, or what has worked well for you, on Firecracker?

- a.
- b.
- c.

5. What do you dislike, or has not worked well, on Firecracker?

- a.
- b.
- c.

6. Please honestly indicate how much you agree or disagree with the following statements:

| Please state your opinion (use ✓) about the following statements:         | Strongly agree | Agree | Neutral | Disagree | Strongly disagree | N/A |
|---------------------------------------------------------------------------|----------------|-------|---------|----------|-------------------|-----|
| I understand how to use Firecracker to complement my coursework           |                |       |         |          |                   |     |
| I use the flashcard questions and topic summaries provided by Firecracker |                |       |         |          |                   |     |
| I use Firecracker on a consistent basis                                   |                |       |         |          |                   |     |
| Firecracker is helping me prepare for my course exam(s)                   |                |       |         |          |                   |     |
| The weekly quizzes test the materials I learn in class                    |                |       |         |          |                   |     |

7. How could we improve Firecracker for you?

- a.
- b.
- c.

8. Any other feedback for Firecracker? Please write in the following space

- a.
- b.
- c.

Thanks very much for your response and cooperation
